# Supplementary material for: Blood-Borne Microparticles Are an Inflammatory Stimulus in Type 2 Diabetes Mellitus
Source: PubMed Central journal article supplement — Immunohorizons. 2023 Jan 16;7(1):71–80. doi: 10.4049/immunohorizons.2200099 (PMC10563440; doi:10.4049/immunohorizons.2200099), 2023-01-16
Supplement: IH_2200099_Supplemental_1.pdf [file IH_2200099_Supplemental_1.pdf]

## Supplement-Figure 1

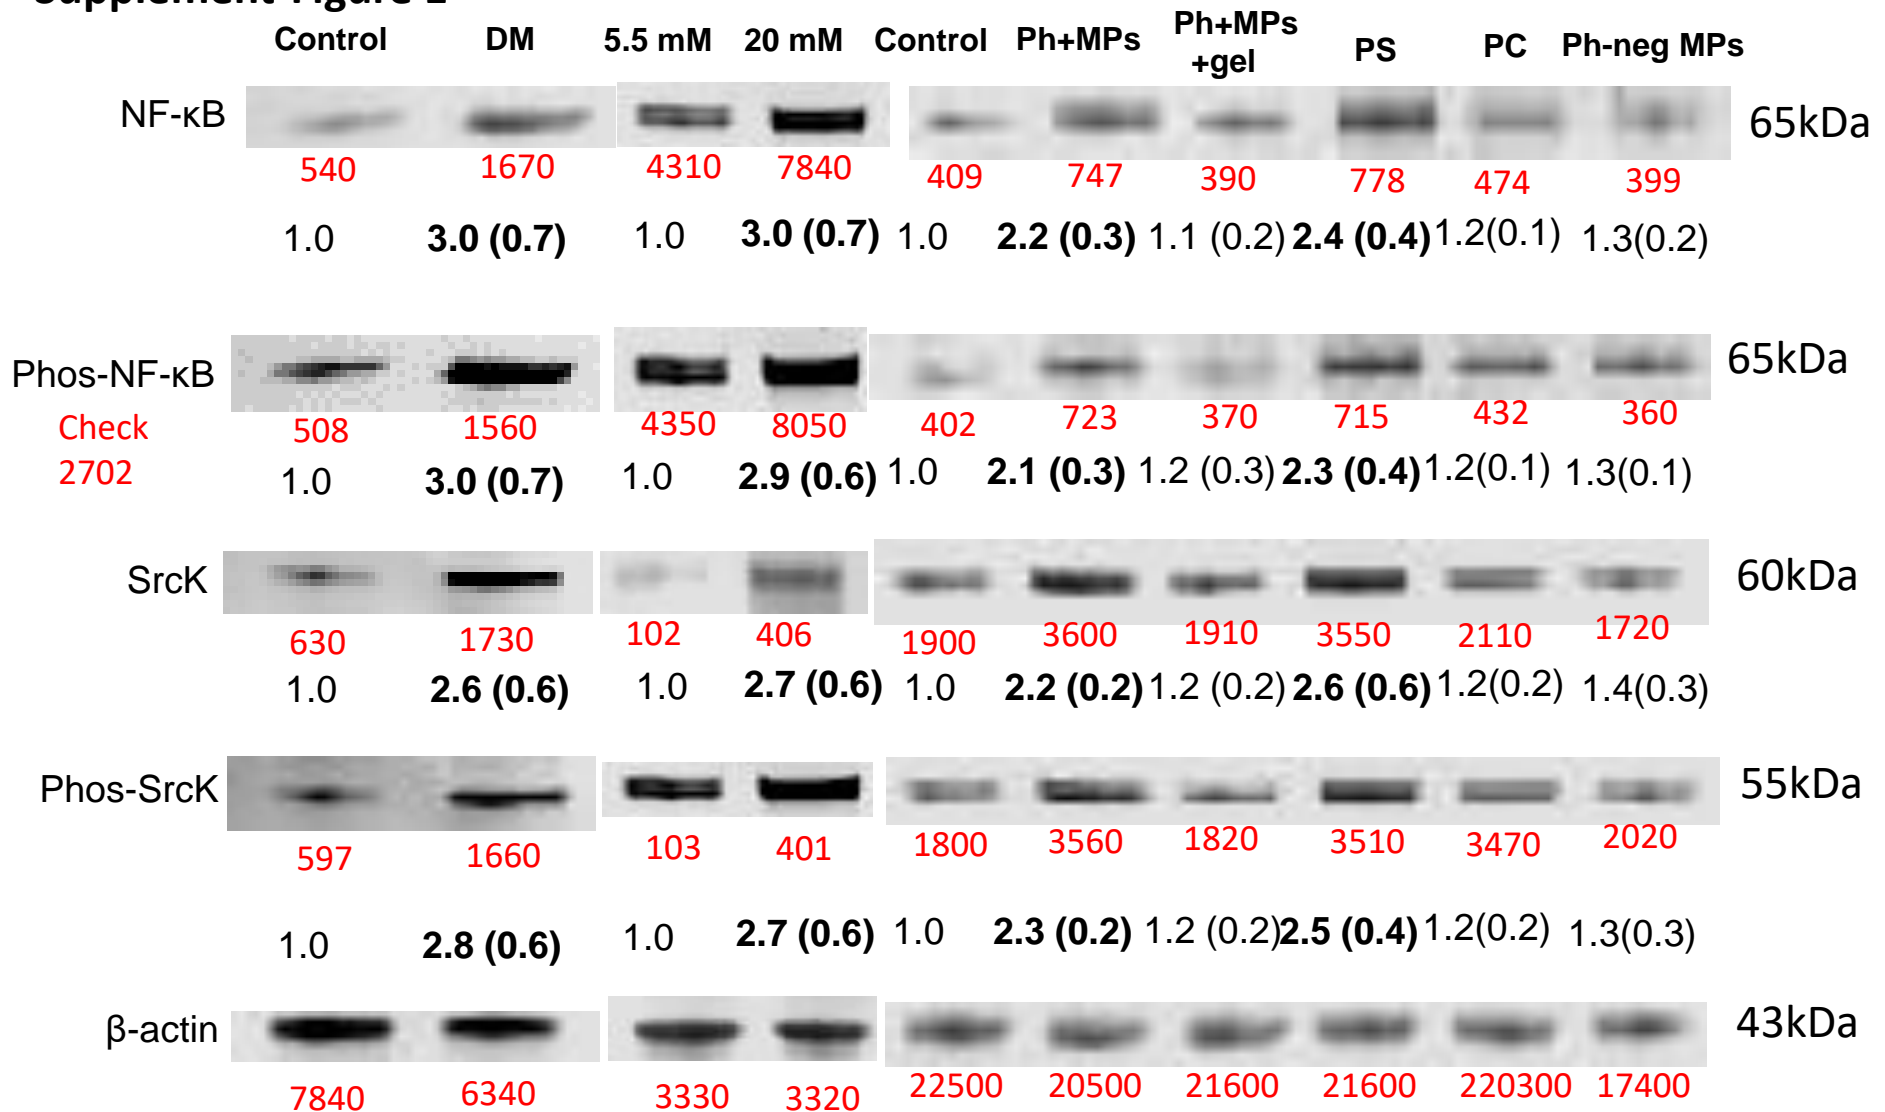

Human Neutrophil Western Blot showing pixel counts (red) for the blot used as representative for figure 2a. Black print shows Mean  $\pm$  SD as is also shown in the manuscript figure.

## Supplement-Figure 2

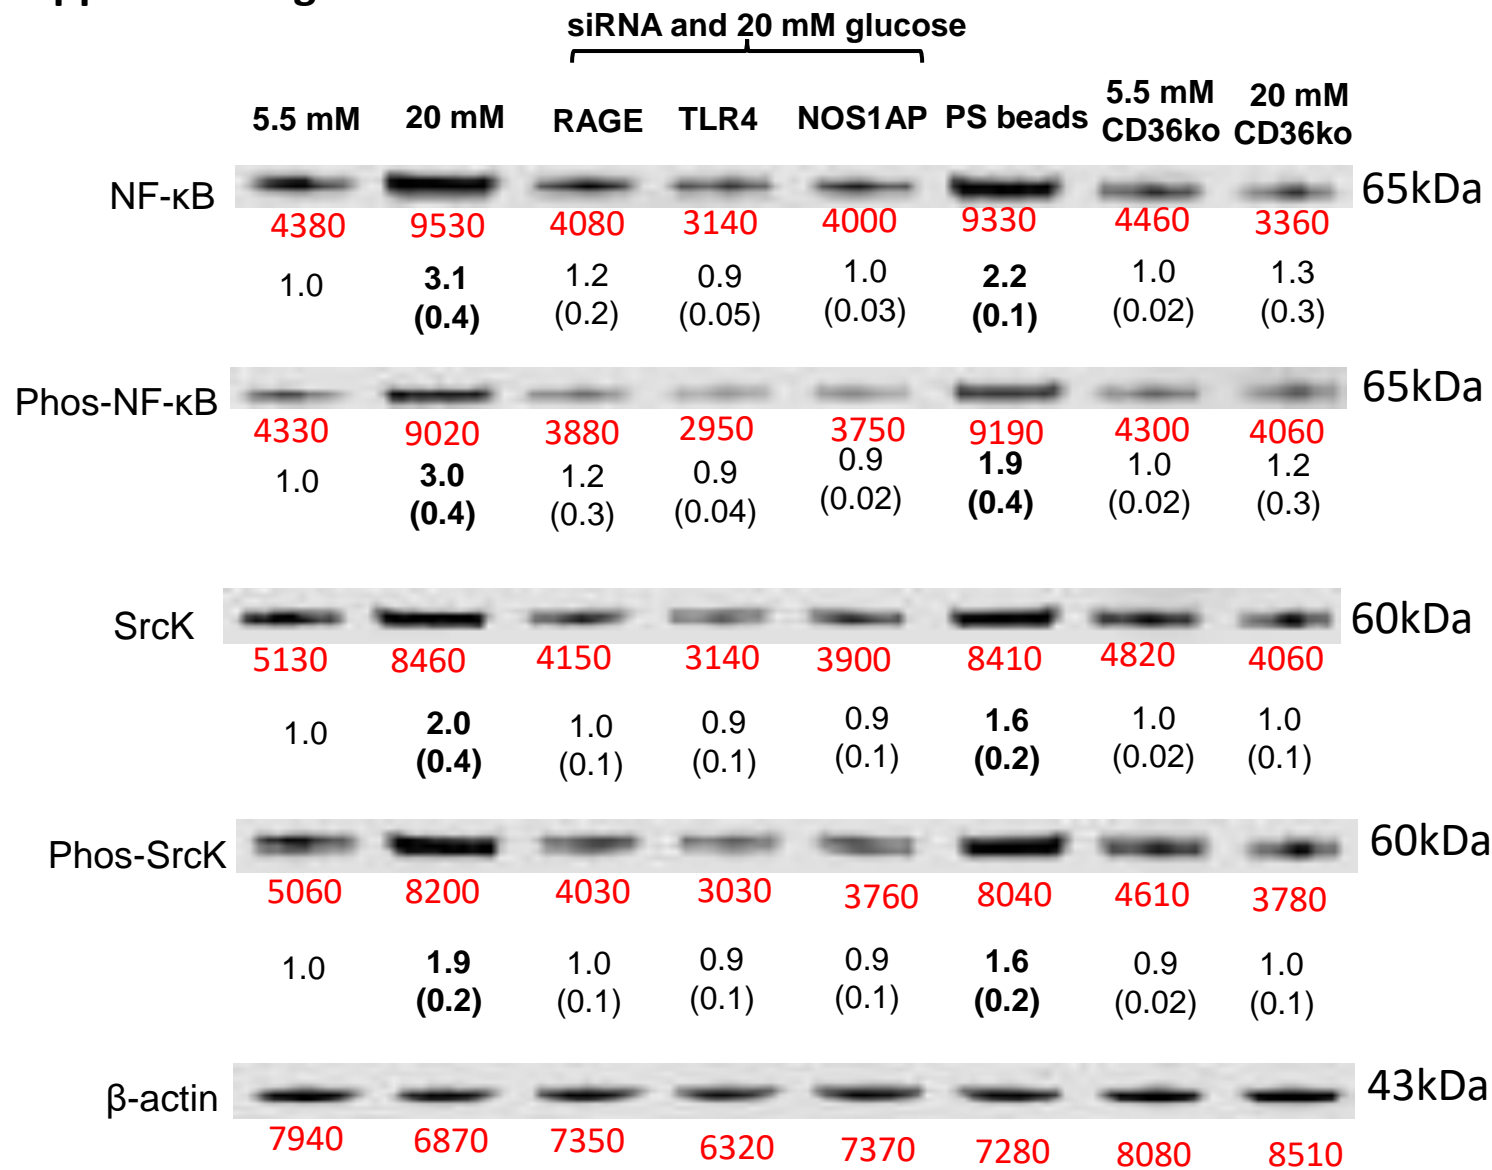

Mouse Western Blot showing pixel counts (red) for the blot used as representative for Manuscript Figure 2b. Black print shows Mean  $\pm$  SD as is also shown in the manuscript figure.

### Supplement-Figure 3.

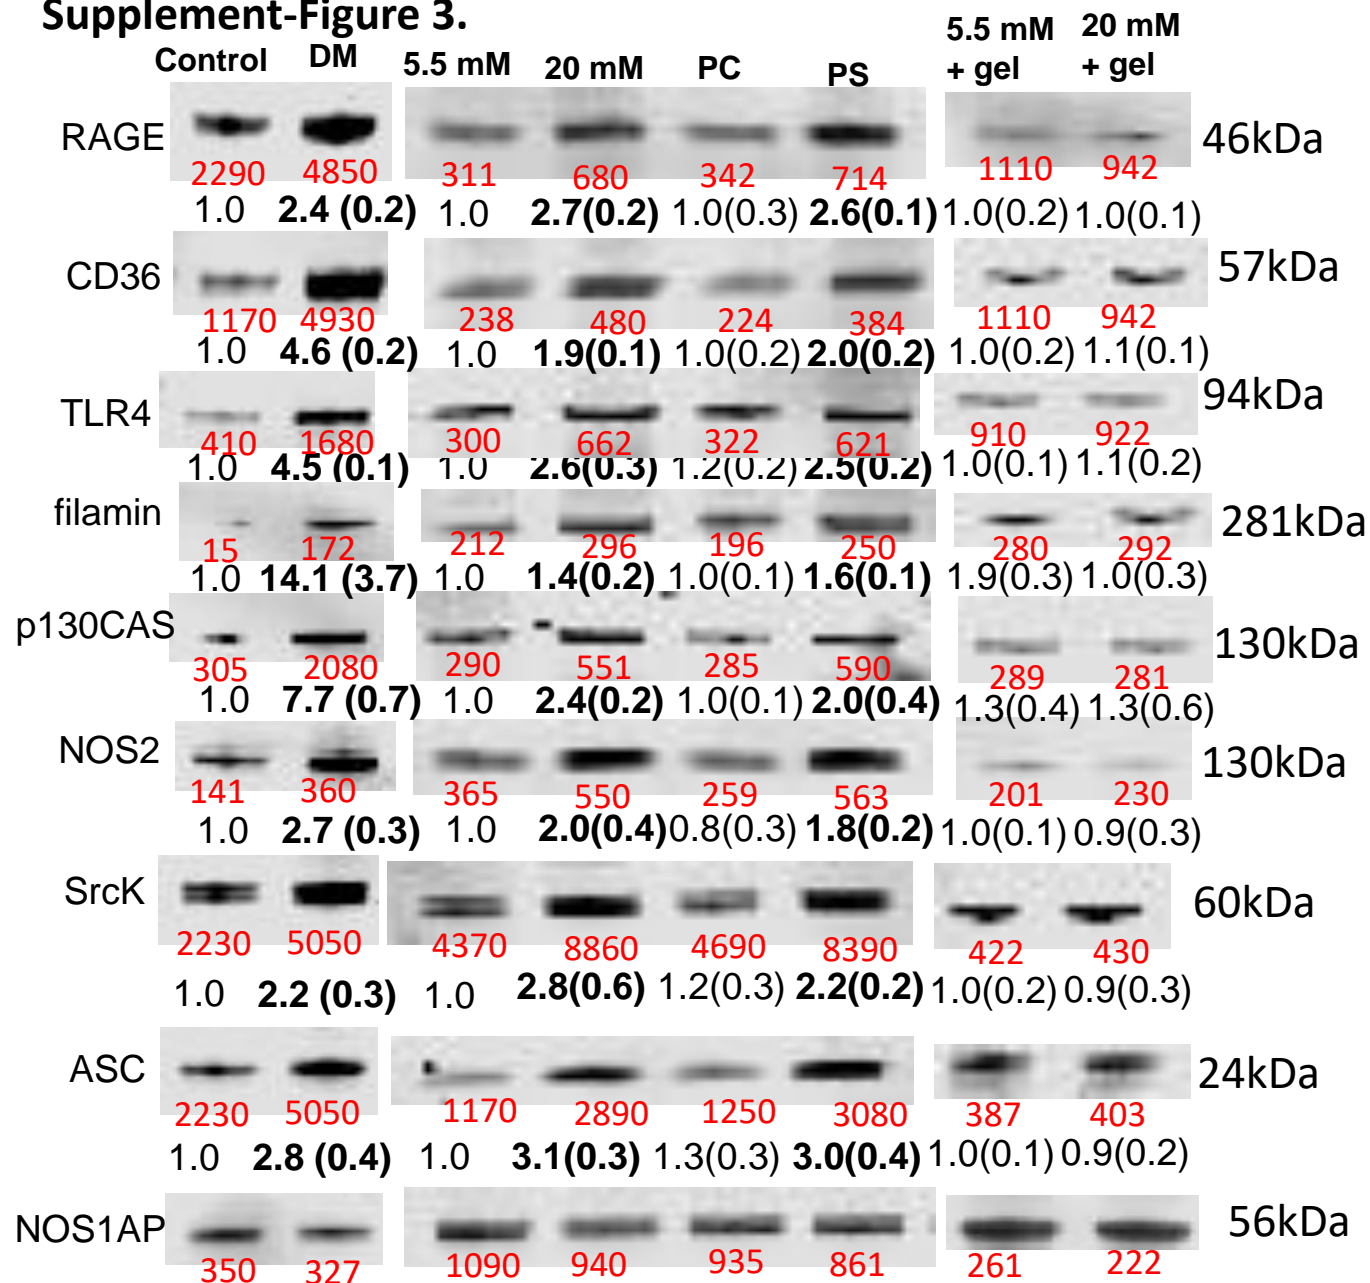

Figure shows pixel counts (red) for the manuscript representative blot Figure 3. Black print shows Mean  $\pm$  SD as is also shown in the manuscript figure.

### Supplement Figure 4

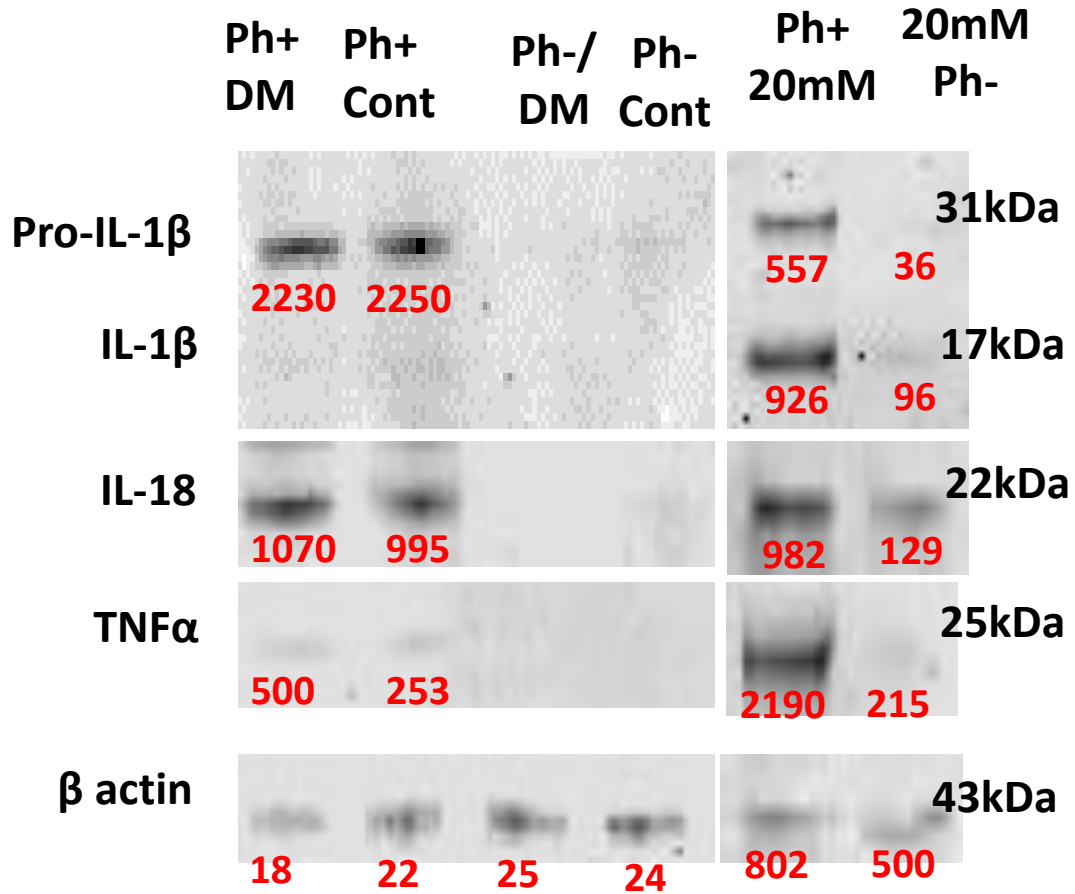

Figure shows pixel counts (red) for the manuscript representative blot Figure 4c.
